# Supplementary material for: Inhibitory Activity of Sedum middendorffianum-Derived 4-Hydroxybenzoic Acid and Vanillic Acid on the Type III Secretion System of Pseudomonas syringae pv. tomato DC3000
Source: PubMed Central journal article supplement — Plant Pathol J. 2020 Dec 1;36(6):608–17. doi: 10.5423/PPJ.OA.08.2020.0162 (PMC7721535; doi:10.5423/ppj.oa.08.2020.0162), 2020-12-01
Supplement: PPJ-36-608_Supple.pdf [file PPJ-36-608_Supple.pdf]

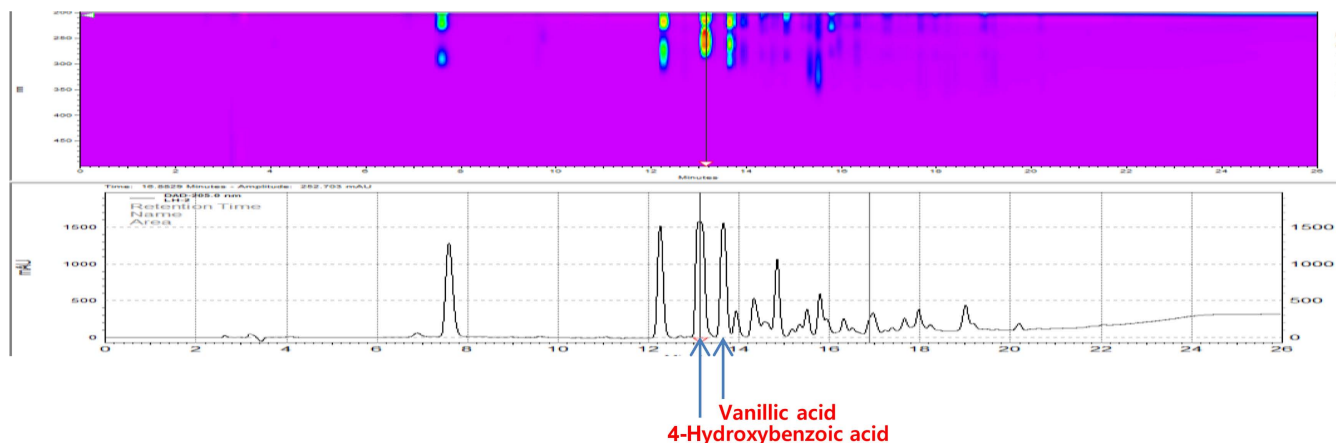

**Supplementary Fig. 1.** High-performance liquid chromatography (HPLC) profile of 4-hydroxybenzoic acid and vanillic acid. HPLC was carried out at a flow rate of 3 ml/min with a linear gradient of solvent from 20% aqueous methanol (0.04% TFA) to 35% aqueous methanol (0.04% TFA) for 20 min.

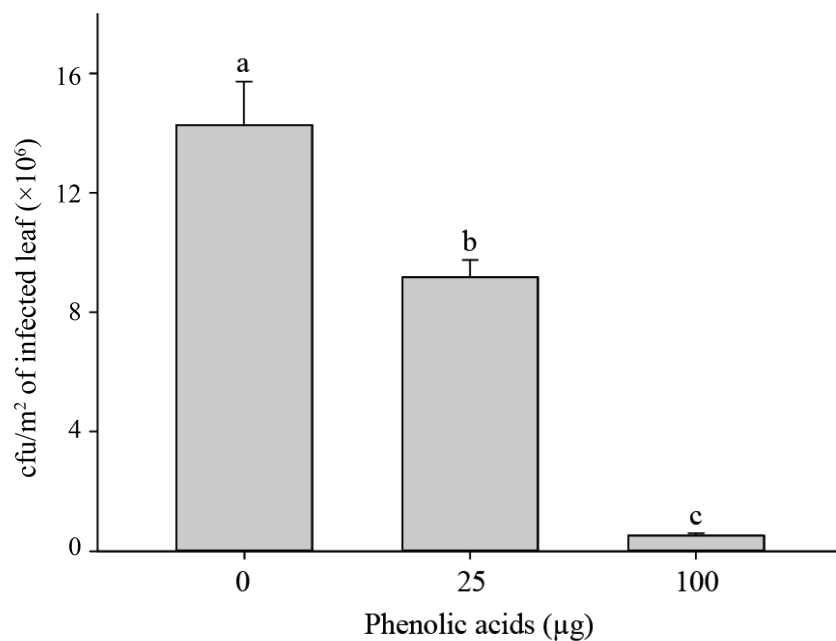

**Supplementary Fig. 2.** The effect of phenolic acids on bacterial population size in tomato leaves. *Pseudomonas syringae* pv. *tomato* DC3000 (*Pst* DC3000) density in tomato leaves was quantified by cfu on KB medium at the 7 days after infection (DAI). Phenolic acids were obtained from sephadex column chromatography and mixed with bacterial suspension of *Pst* DC3000 before syringe-infiltration. Twenty-five µg of phenolic acids contained 17.8 µg of 4-hydroxybenzoic acid and 7.2 µg of vanillic acid of which quantity was 4 times higher in 100 µg of phenolic acids. Different letters on the bars indicate significant difference ( $P < 0.05$ ) between treatments.
